# Supplementary material for: Developing an atroposelective dynamic kinetic resolution of MRTX1719 by resolving incompatible chemical operations
Source: Royal Society of Chemistry journal article supplement (doi:10.1039/d2cc03627d), 2022-01-01
Supplement: d2cc03627d1.pdf [file d2cc03627d1.pdf]

# Developing An Atroposelective Dynamic Kinetic Resolution of MRTX1719 by Resolving Incompatible Chemical Operations

Michal M. Achmatowicz<sup>†</sup>, Cheng-yi-Chen, David R. Snead<sup>†\*</sup>

Address: *Mirati Therapeutics, Chemical Process Research and Development, 3545 Cray Ct, San Diego, CA 92121*

## Contents

|                                          |   |
|------------------------------------------|---|
| Continuous Resolution of R-BINOL: .....  | 2 |
| Batch Resolution of MRTX1719: .....      | 6 |
| Continuous Resolution of MRTX1719: ..... | 9 |

## Continuous Resolution of R-BINOL:

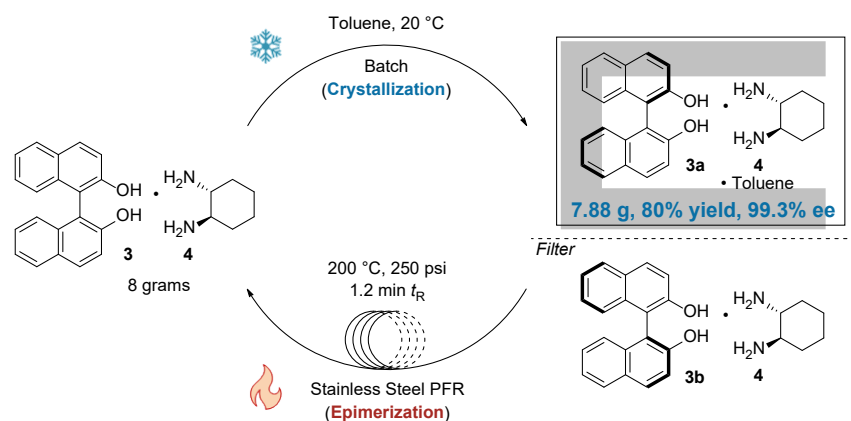

**Scheme S1:**

1,1'-Bi-2-naphthol (5.71 g, 19.9 mmol, 1.00 equiv.) was added to an Erlenmeyer flask equipped with a magnetic stir-bar. 80 mL of toluene was added to the flask. The flask was then heated to 80 °C on a hot-plate, while stirring. (1R, 2R)-diaminocyclohexane (2.28 g, 19.9 mmol, 1.00 equiv.) was added to the hot BINOL, and the slurry quickly transitioned to a homogeneous phase. After becoming homogeneous, crystals began to form, heating was turned off, and the mixture was allowed to cool to room temperature and age for 1 hr. A sample of the supernatant was collected for HPLC analysis. A 20  $\mu$ m stainless steel HPLC filter from IDEX was immersed in the toluene. It was connected to an Eldex Optos Model 3 metering pump by 1/8" O.D. PFA tubing (1/16" I.D.). The pump was connected to a stainless steel plug flow reactor (3.5 mL, 1/8" O.D, 0.09" I.D.) by PFA tubing (1/8" O.D., 1/16" I.D.). Swagelok 1/8" compression fittings were used to securely connect the tubing. The outlet of the plug flow reactor (PFR) was connected to a 250 psi spring-loaded back pressure regulator from IDEX. The stream flowed out of the bpr and back into the Erlenmeyer crystallization flask. The plug-flow reactor was immersed in mineral oil heated to 200 °C, and prior to pumping the BINOL solution through the stainless steel filter and PFR, the recycle loop was pre-filled with pure toluene to facilitate start-up of the recycle procedure. The pump driving the recycle loop was operated at a rate of 3 mL/min, and the recycle was run continuously for 30 hr. After this time, the solids in the flask were filtered. The solids were washed with 5 mL of toluene and left on the filter until dry. 7.88 g of white solid was obtained. The complex was a 1:1:1 mixture of BINOL, diamine and toluene (MW 492 g/mol). Sample was submitted for <sup>1</sup>H qNMR analysis to attain the assay weight percent. Spectrum matched that reported in the literature. It was 99.6% of the 81.0% assay wt. percent of the BINOL/diaminocyclohexane complex corresponding to 99.6 assay wt% of the 1:1:1 complex of BINOL, diamine, and toluene. The assay adjusted isolated yield is 80%. Sample was taken for chiral HPLC analysis. The sample showed 99.65% of R-BINOL and 0.35% of S-BINOL (99.3% ee).

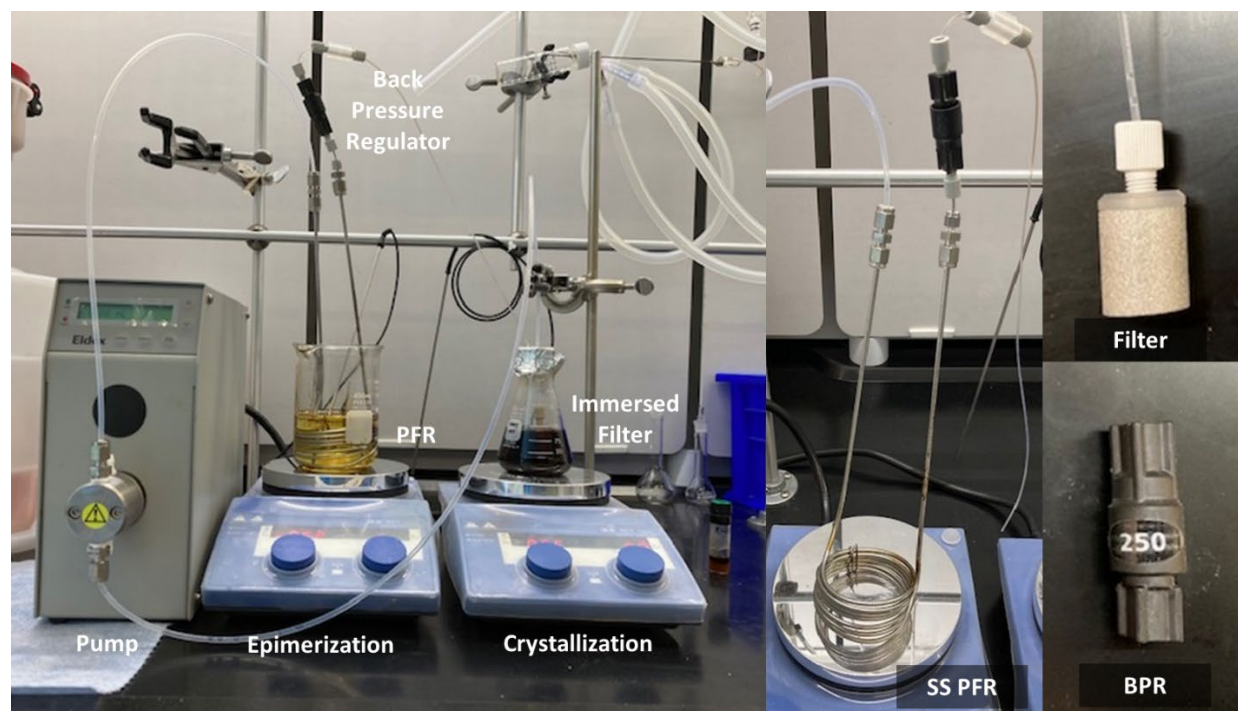

**Figure S1:** Reaction Setup for Resolution of BINOL.

D5103\_01\_7.88g

**<sup>1</sup>H qNMR of R-BINOL:**

0.0500 g of crystallized solids

0.0193  $\mu$ L of DMF as internal standard

81wt% as the BINOL-diaminocyclohexane salt

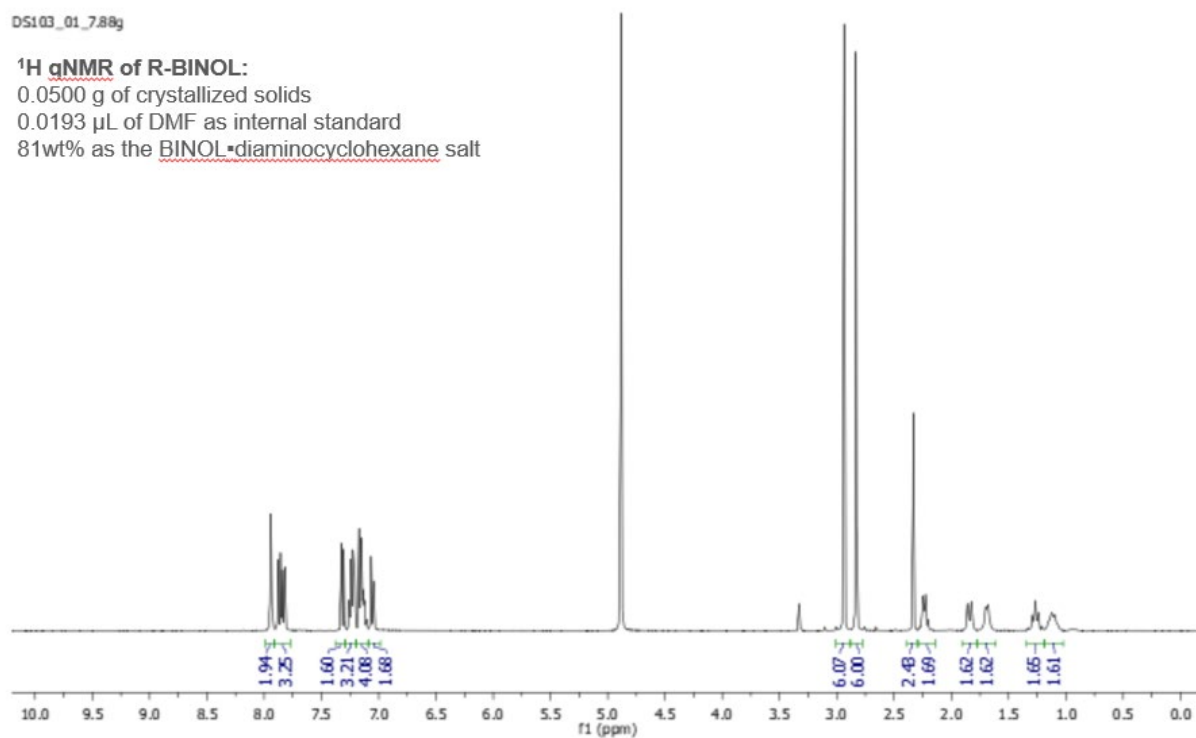

**Table S1:** HPLC conditions for BINOL. Spectra of R and S isomers of BINOL

|                    |                                                                                    |
|--------------------|------------------------------------------------------------------------------------|
| Column             | Chiralpak IC, 5 $\mu$ m, 4.6 x 250 mm (Daicel Chiral Technologies, Part No. 83325) |
| Wavelength         | 265 nm                                                                             |
| Column Temperature | 40 $^{\circ}$ C                                                                    |
| Column Flow        | 1.3 mL/min                                                                         |
| Acquisition Time   | 8 min                                                                              |
| Isocratic Elution  | Hexane:2-Propanol 90:10 (v/v)                                                      |
| Injection Volume   | 5 $\mu$ L                                                                          |
| Retention Times    | ~4.5 min ( <i>R</i> -BINOL), ~6.0 min ( <i>S</i> -BINOL)                           |

**HPLC Chromatogram of R-BINOL:**

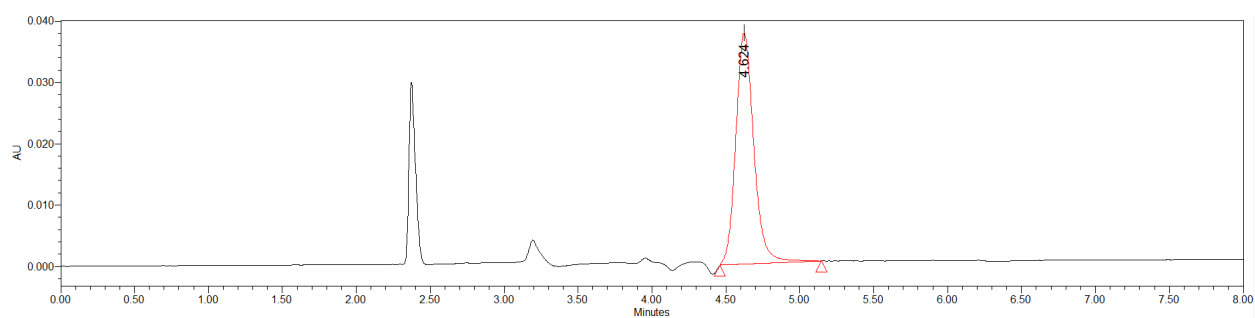

**HPLC Chromatogram of S-BINOL:**

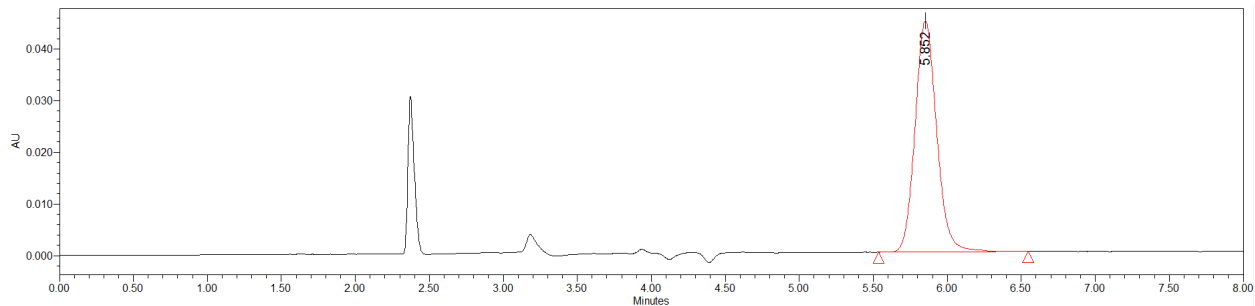

**HPLC Chromatogram of Supernatant after 1 hr of aging:**

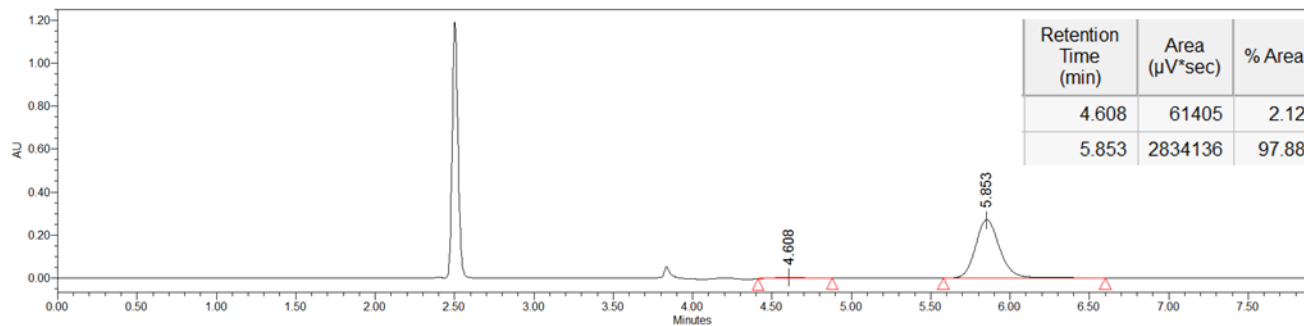

### HPLC Chromatogram of Eluent from Flash Epimerization at t = 0:

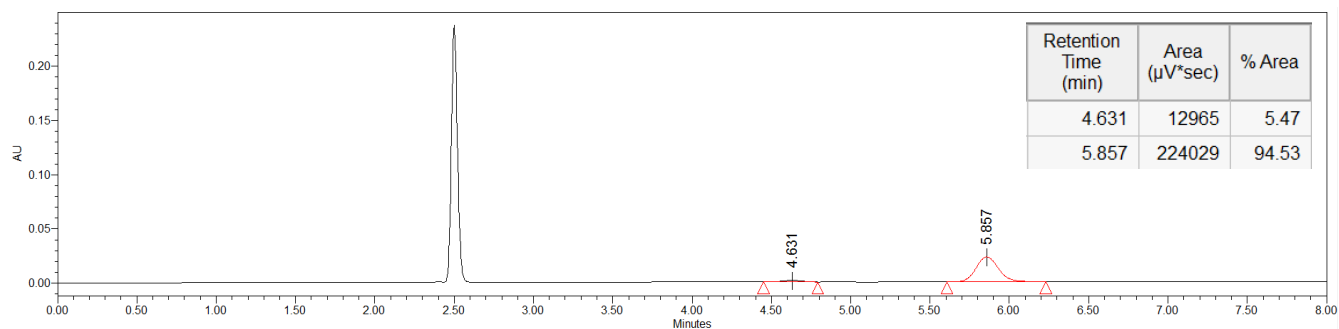

### HPLC of crystallized R-BINOL:

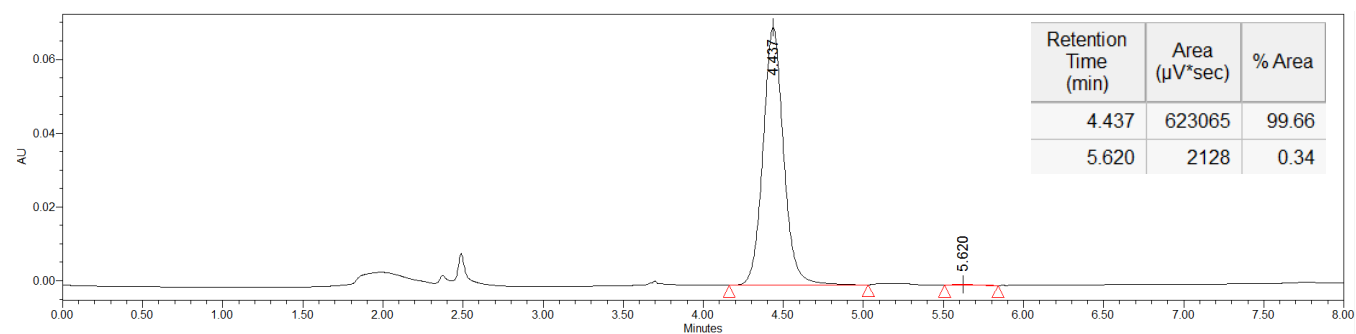

## Batch Resolution of MRTX1719:

Description of Batch crystallization.

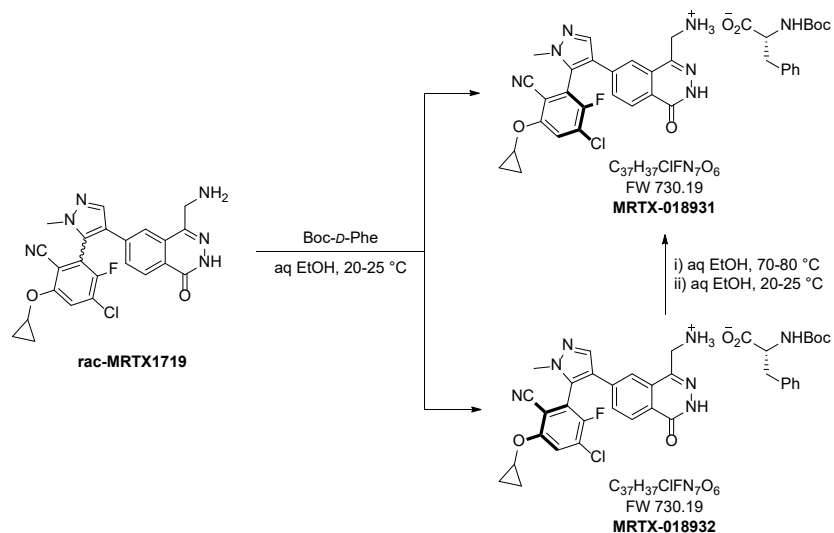

**rac-MRTX1719** (1.0 equiv) and **Boc-D-Phe** (1.1 equiv) were allowed to dissolve in EtOH:water (90:10 v/v, 12 V) at room temperature. The resulting supersaturated mixture was seeded with 0.5% w/w of **MRTX-018931** (**MRTX1719 Boc-D-Phe** salt) and equilibrated at ~22 °C until selective crystallization of **MRTX1719 Boc-D-Phe** salt (**MRTX-018931**) was complete while the supernatant became enriched in the undesired enantiomer salt (**MRTX-018932**). The crystalline solids were separated by filtration and additional reslurry in aqueous EtOH (85:15 v/v, 10 V) was performed to effect additional chiral upgrade (target:  $\geq 95.5\%$  enantiomeric excess [e.e.] by chiral HPLC). The mother liquors consisting of a mixture of **MRTX-018932** and **MRTX-018932** in aqueous EtOH were thermally racemized (target:  $<20\%$  enantiomeric excess [e.e.] by chiral HPLC) at 70-80 °C for 24-48 h. Additional crop of **MRTX1719 Boc-D-Phe** salt (**MRTX-018931**) was obtained by repeating the aging and reslurry as described above (target:  $\geq 95.5\%$  enantiomeric excess [e.e.] by chiral HPLC). Drying of the resulting crystalline solids at ~45°C afforded **MRTX-018931** as off white solids in combined 60% yield (first crop: 37% yield; second crop: 23% yield).



**MRTX-018931 – <sup>19</sup>F NMR (d<sub>6</sub>-DMSO)**

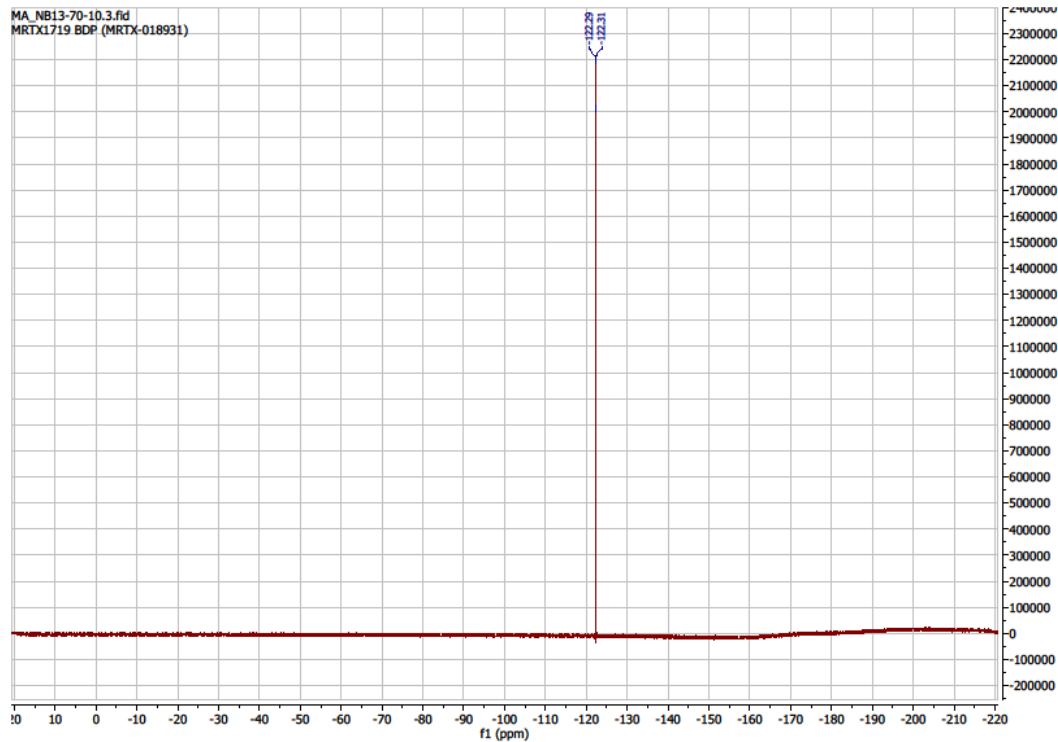

**Table S2:** HPLC conditions for 1719.

|                    |                                                                                    |
|--------------------|------------------------------------------------------------------------------------|
| Column             | Chiralpak IC, 5 $\mu$ m, 4.6 x 250 mm (Daicel Chiral Technologies, Part No. 83325) |
| Wavelength         | 265 nm                                                                             |
| Column Temperature | 40 $^{\circ}$ C                                                                    |
| Column Flow        | 1.3 mL/min                                                                         |
| Acquisition Time   | 8 min                                                                              |
| Isocratic Elution  | Ethanol (0.1% Ethanolamine):Heptane 90:10 (v/v)                                    |
| Injection Volume   | 10 $\mu$ L                                                                         |
| Retention Times    | $\sim$ 9.7 min (MRTX1719), $\sim$ 7.4 min (MRTX1273)                               |

## Continuous Resolution of MRTX1719:

Racemic MRTX1719 (92.4 wt%, 10.82 g, 21.5 mmol) was suspended in ethanol and water mixture (EtOH:water 98:2 v/v, 100 mL) in 100 mL EasyMax reactor. Solid Boc-D-phenylalanine (6.25 g, 23.6 mmol, 1.1 equiv) was added and the resulting thick slurry was agitated at 600 rpm using overhead stirrer at room temperature. Within 10 min nearly all the solids went into solution affording a thin yellowish suspension. Thus obtained supersaturated solution of MRTX-018931 was seeded with crystalline MRTX-018931 (78 mg, 0.0050 equiv) and allowed to equilibrate with efficient agitation at room temperature. After ~16 h thick slurry of crystals was obtained. Analysis of the supernatant by chiral LC showed 91.5% of MRTX1273 and 8.5% of MRTX1719 (83% e.e.) with MRTX-018932 at 39.7 mg/mL (equilibrium solubility of ~40 mg/mL) and MRTX-018931 at 3.7 mg/mL (equilibrium solubility of ~4 mg/mL). Having confirmed the mixture is close to equilibrium  $_{\text{SPACEDKR}}$  process was initiated. A 20  $\mu\text{m}$  stainless steel HPLC filter from IDEX was immersed in the crystallization vessel (100 mL EasyMax reactor) containing thick slurry of MRTX-018931 in ethanol water mixture. It was connected to a Syrris Asia Syringe Pump by 1/16" O.D. PFA tubing (0.03" I.D.). The pump was connected to a plug flow reactor made from PFA tubing (1.5 mL, 1/16" O.D, 0.03" I.D.). The outlet of the plug flow reactor (PFR) was connected to a 250 psi spring-loaded back pressure regulator from IDEX. The stream flowed out of the bpr and back into the crystallization vessel. The plug-flow reactor was immersed in mineral oil heated to 160 °C. The pump driving the recycle loop was operated at a rate of 0.75 mL/min, and the recycle was run continuously for 14.5 h. Intermittent HPLC sampling was conducted. After 14.5 h the productive phase of  $_{\text{SPACEDKR}}$  was completed as indicated by nearly identical supernatant concentration of MRTX-018932 and MRTX-018931 (5.4 mg/mL and 4.3 mg/mL, respectively). The slurry from the crystallizer was filtered. The filtercake was thoroughly deliquored and air-dried to afford technical MRTX-018931 as off-white powder in 87% yield (14.43 g, 94.2 wt%, 90% d.r., 98.0% LC). Additional reslurry in aq EtOH (EtOH:water 95:5 v/v, 10 V) for 6 h with temperature cycling (20-40 °C) upgraded the chiral and achiral purity (96.6 d.r., 98.5% LC) at the cost of 5% product loss to the liquors.

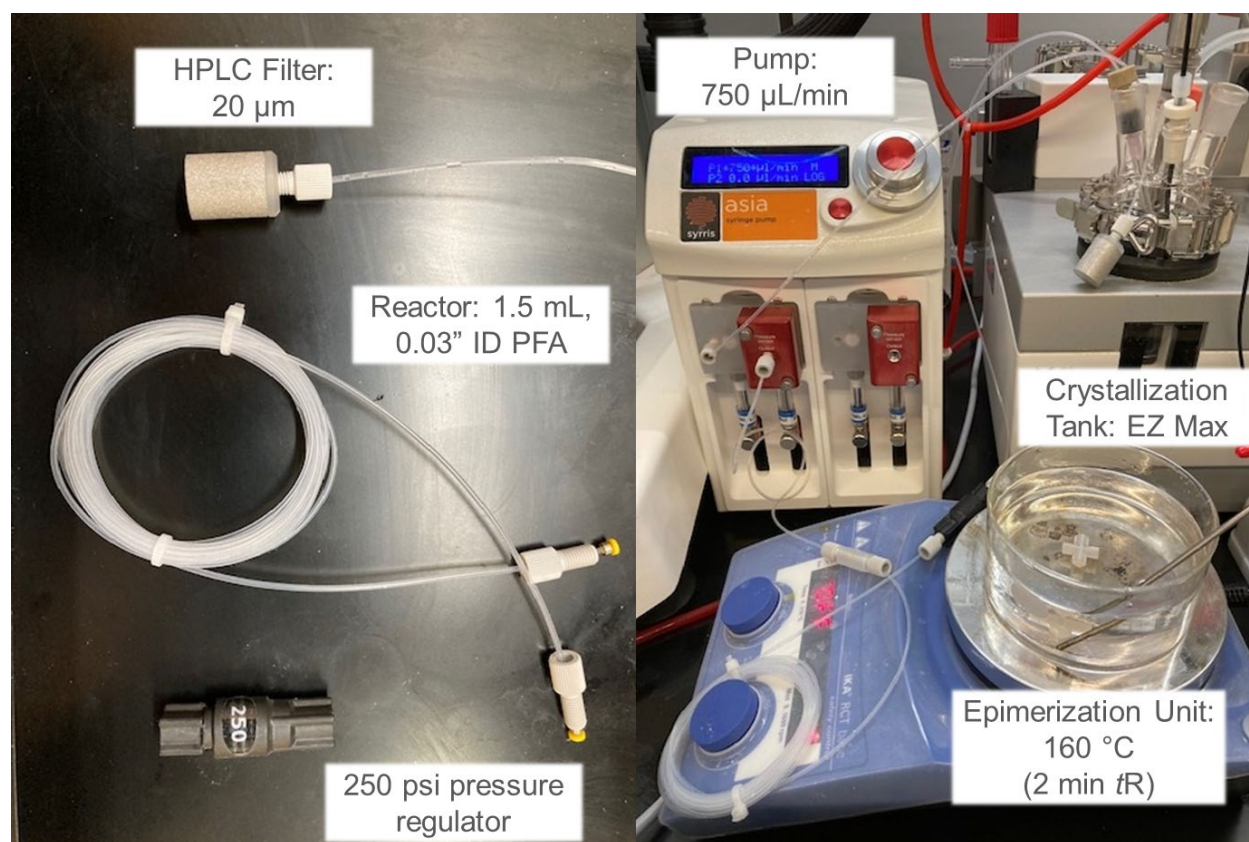

**Figure S2:** Reaction setup for Resolution of MRTX1719.

# Racemic MRTX1719 input (achiral LC)

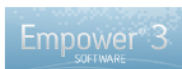

1719

## SAMPLE INFORMATION

|                   |                           |                     |                               |
|-------------------|---------------------------|---------------------|-------------------------------|
| Sample Name:      | NB51-40-0 slurry, 100xdil | Acquired By:        | AchmatowiczM                  |
| Sample Type:      | Unknown                   | Sample Set Name:    | MA_Agilent5_05032022a         |
| Vial:             | 1:D,4                     | Acq. Method Set:    | MRTX1719_AgilentLC5_14min     |
| Injection #:      | 1                         | Processing Method:  | 1719_14min                    |
| Injection Volume: | 5.00 ul                   | Channel Name:       | DAD.0.0                       |
| Run Time:         | 14.0 Minutes              | Proc. Chnl. Descr.: | DAD: Signal A, 265 nm/Bw:4 nm |
| Date Acquired:    | 5/3/2022 4:31:18 PM PDT   |                     |                               |
| Date Processed:   | 6/13/2022 2:18:17 PM PDT  |                     |                               |

## Auto-Scaled Chromatogram

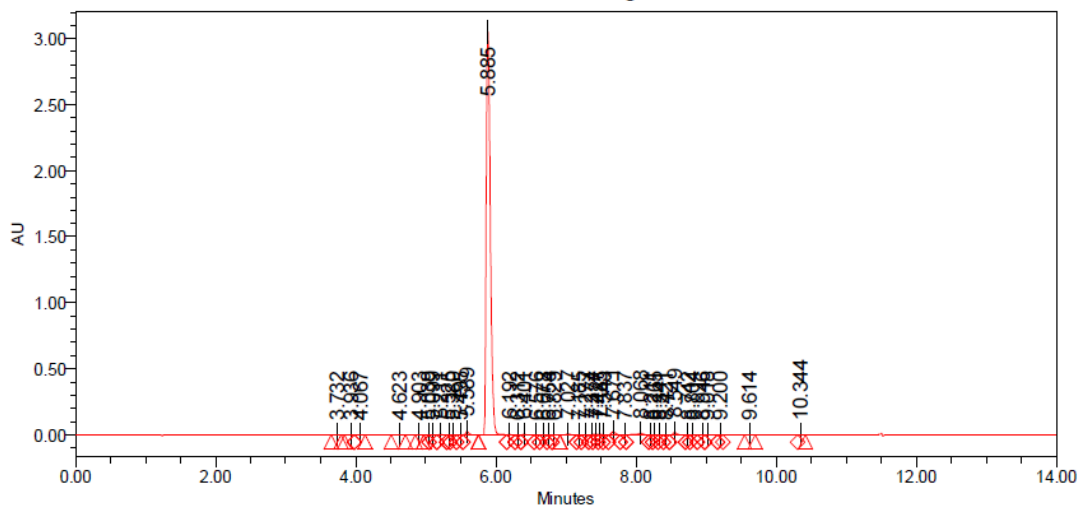

## Peak Results

|    | Name | RT    | Area | Height | Amount | % Area |
|----|------|-------|------|--------|--------|--------|
| 1  |      | 3.732 | 1152 | 315    |        | 0.01   |
| 2  |      | 3.936 | 879  | 209    |        | 0.01   |
| 3  |      | 4.067 | 4030 | 1218   |        | 0.03   |
| 4  |      | 4.623 | 1662 | 448    |        | 0.01   |
| 5  |      | 4.903 | 806  | 295    |        | 0.01   |
| 6  |      | 5.039 | 1128 | 522    |        | 0.01   |
| 7  |      | 5.099 | 6946 | 1992   |        | 0.05   |
| 8  |      | 5.211 | 9096 | 2835   |        | 0.07   |
| 9  |      | 5.325 | 677  | 248    |        | 0.01   |
| 10 |      | 5.380 | 1169 | 304    |        | 0.01   |

Reported by User: Michal Achmatowicz (AchmatowiczM)  
 Report Method: 1719  
 Report Method ID: 3344  
 Page: 1 of 3

Project Name: 2\_PRMT5  
 Date Printed:  
 6/13/2022  
 2:18:39 PM US/Pacific

## Peak Results

|    | Name | RT     | Area     | Height  | Amount | % Area |
|----|------|--------|----------|---------|--------|--------|
| 11 |      | 5.495  | 4876     | 1430    |        | 0.04   |
| 12 |      | 5.589  | 79773    | 26248   |        | 0.63   |
| 13 |      | 5.885  | 12276237 | 3051328 |        | 96.39  |
| 14 |      | 6.192  | 10781    | 2466    |        | 0.08   |
| 15 |      | 6.312  | 5839     | 1677    |        | 0.05   |
| 16 |      | 6.401  | 14155    | 3499    |        | 0.11   |
| 17 |      | 6.576  | 942      | 241     |        | 0.01   |
| 18 |      | 6.678  | 3509     | 992     |        | 0.03   |
| 19 |      | 6.754  | 1989     | 600     |        | 0.02   |
| 20 |      | 6.829  | 1496     | 430     |        | 0.01   |
| 21 |      | 7.027  | 23324    | 6726    |        | 0.18   |
| 22 |      | 7.185  | 758      | 276     |        | 0.01   |
| 23 |      | 7.277  | 3586     | 949     |        | 0.03   |
| 24 |      | 7.374  | 4542     | 2197    |        | 0.04   |
| 25 |      | 7.427  | 11932    | 3225    |        | 0.09   |
| 26 |      | 7.485  | 9143     | 2765    |        | 0.07   |
| 27 |      | 7.543  | 4461     | 1604    |        | 0.04   |
| 28 |      | 7.671  | 84118    | 21155   |        | 0.66   |
| 29 |      | 7.837  | 3979     | 934     |        | 0.03   |
| 30 |      | 8.068  | 76454    | 11148   |        | 0.60   |
| 31 |      | 8.211  | 2948     | 1034    |        | 0.02   |
| 32 |      | 8.265  | 4246     | 1358    |        | 0.03   |
| 33 |      | 8.341  | 3513     | 1067    |        | 0.03   |
| 34 |      | 8.421  | 2135     | 575     |        | 0.02   |
| 35 |      | 8.549  | 59394    | 18276   |        | 0.47   |
| 36 |      | 8.742  | 758      | 266     |        | 0.01   |
| 37 |      | 8.804  | 1597     | 367     |        | 0.01   |
| 38 |      | 8.946  | 2589     | 713     |        | 0.02   |
| 39 |      | 9.018  | 7313     | 1609    |        | 0.06   |
| 40 |      | 9.200  | 509      | 188     |        | 0.00   |
| 41 |      | 9.614  | 870      | 236     |        | 0.01   |
| 42 |      | 10.344 | 752      | 250     |        | 0.01   |

Processed Channel: DAD: Signal A, 265 nm/Bw:4 nm

|   | Processed Channel             | Retention Time (min) | Area | % Area | Height |
|---|-------------------------------|----------------------|------|--------|--------|
| 1 | DAD: Signal A, 265 nm/Bw:4 nm | 3.732                | 1152 | 0.01   | 315    |
| 2 | DAD: Signal A, 265 nm/Bw:4 nm | 3.936                | 879  | 0.01   | 209    |
| 3 | DAD: Signal A, 265 nm/Bw:4 nm | 4.067                | 4030 | 0.03   | 1218   |
| 4 | DAD: Signal A, 265 nm/Bw:4 nm | 4.623                | 1662 | 0.01   | 448    |
| 5 | DAD: Signal A, 265 nm/Bw:4 nm | 4.903                | 806  | 0.01   | 295    |
| 6 | DAD: Signal A, 265 nm/Bw:4 nm | 5.039                | 1128 | 0.01   | 522    |

Reported by User: Michal Achmatowicz (AchmatowiczM)

Report Method: 1719

Report Method ID: 3344

Page: 2 of 3

Project Name: 2\_PRMT5

Date Printed:

6/13/2022

2:18:39 PM US/Pacific

Processed Channel: DAD: Signal A, 265 nm/Bw:4 nm

|    | Processed Channel             | Retention Time (min) | Area     | % Area | Height  |
|----|-------------------------------|----------------------|----------|--------|---------|
| 7  | DAD: Signal A, 265 nm/Bw:4 nm | 5.099                | 6946     | 0.05   | 1992    |
| 8  | DAD: Signal A, 265 nm/Bw:4 nm | 5.211                | 9096     | 0.07   | 2835    |
| 9  | DAD: Signal A, 265 nm/Bw:4 nm | 5.325                | 677      | 0.01   | 248     |
| 10 | DAD: Signal A, 265 nm/Bw:4 nm | 5.380                | 1169     | 0.01   | 304     |
| 11 | DAD: Signal A, 265 nm/Bw:4 nm | 5.495                | 4876     | 0.04   | 1430    |
| 12 | DAD: Signal A, 265 nm/Bw:4 nm | 5.589                | 79773    | 0.63   | 26248   |
| 13 | DAD: Signal A, 265 nm/Bw:4 nm | 5.885                | 12276237 | 96.39  | 3051328 |
| 14 | DAD: Signal A, 265 nm/Bw:4 nm | 6.192                | 10781    | 0.08   | 2466    |
| 15 | DAD: Signal A, 265 nm/Bw:4 nm | 6.312                | 5839     | 0.05   | 1677    |
| 16 | DAD: Signal A, 265 nm/Bw:4 nm | 6.401                | 14155    | 0.11   | 3499    |
| 17 | DAD: Signal A, 265 nm/Bw:4 nm | 6.576                | 942      | 0.01   | 241     |
| 18 | DAD: Signal A, 265 nm/Bw:4 nm | 6.678                | 3509     | 0.03   | 992     |
| 19 | DAD: Signal A, 265 nm/Bw:4 nm | 6.754                | 1989     | 0.02   | 600     |
| 20 | DAD: Signal A, 265 nm/Bw:4 nm | 6.829                | 1496     | 0.01   | 430     |
| 21 | DAD: Signal A, 265 nm/Bw:4 nm | 7.027                | 23324    | 0.18   | 6726    |
| 22 | DAD: Signal A, 265 nm/Bw:4 nm | 7.185                | 758      | 0.01   | 276     |
| 23 | DAD: Signal A, 265 nm/Bw:4 nm | 7.277                | 3586     | 0.03   | 949     |
| 24 | DAD: Signal A, 265 nm/Bw:4 nm | 7.374                | 4542     | 0.04   | 2197    |
| 25 | DAD: Signal A, 265 nm/Bw:4 nm | 7.427                | 11932    | 0.09   | 3225    |
| 26 | DAD: Signal A, 265 nm/Bw:4 nm | 7.485                | 9143     | 0.07   | 2765    |
| 27 | DAD: Signal A, 265 nm/Bw:4 nm | 7.543                | 4461     | 0.04   | 1604    |
| 28 | DAD: Signal A, 265 nm/Bw:4 nm | 7.671                | 84118    | 0.66   | 21155   |
| 29 | DAD: Signal A, 265 nm/Bw:4 nm | 7.837                | 3979     | 0.03   | 934     |
| 30 | DAD: Signal A, 265 nm/Bw:4 nm | 8.068                | 76454    | 0.60   | 11148   |
| 31 | DAD: Signal A, 265 nm/Bw:4 nm | 8.211                | 2948     | 0.02   | 1034    |
| 32 | DAD: Signal A, 265 nm/Bw:4 nm | 8.265                | 4246     | 0.03   | 1358    |
| 33 | DAD: Signal A, 265 nm/Bw:4 nm | 8.341                | 3513     | 0.03   | 1067    |
| 34 | DAD: Signal A, 265 nm/Bw:4 nm | 8.421                | 2135     | 0.02   | 575     |
| 35 | DAD: Signal A, 265 nm/Bw:4 nm | 8.549                | 59394    | 0.47   | 18276   |
| 36 | DAD: Signal A, 265 nm/Bw:4 nm | 8.742                | 758      | 0.01   | 266     |
| 37 | DAD: Signal A, 265 nm/Bw:4 nm | 8.804                | 1597     | 0.01   | 367     |
| 38 | DAD: Signal A, 265 nm/Bw:4 nm | 8.946                | 2589     | 0.02   | 713     |
| 39 | DAD: Signal A, 265 nm/Bw:4 nm | 9.018                | 7313     | 0.06   | 1609    |
| 40 | DAD: Signal A, 265 nm/Bw:4 nm | 9.200                | 509      | 0.00   | 188     |
| 41 | DAD: Signal A, 265 nm/Bw:4 nm | 9.614                | 870      | 0.01   | 236     |
| 42 | DAD: Signal A, 265 nm/Bw:4 nm | 10.344               | 752      | 0.01   | 250     |

# Racemic MRTX1719 input (chiral LC)

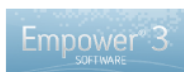

1719

## SAMPLE INFORMATION

|                                          |                           |                     |                               |
|------------------------------------------|---------------------------|---------------------|-------------------------------|
| Sample Name:                             | NB51-40-0 slurry, 100xdil | Acquired By:        | AchmatowiczM                  |
| Sample Type:                             | Unknown                   | Sample Set Name:    | MA_Agilent1_04272022f         |
| Vial:                                    | 1:F,2                     | Acq. Method Set:    | HPLC000305_Chiral             |
| Injection #:                             | 1                         | Processing Method:  | 1719 chiral purity v2         |
| Injection Volume:                        | 5.00 ul                   | Channel Name:       | MWD.0.0                       |
| Run Time:                                | 15.0 Minutes              | Proc. Chnl. Descr.: | MWD: Signal A, 265 nm/Bw:4 nm |
| Date Acquired: 4/27/2022 4:28:50 PM PDT  |                           |                     |                               |
| Date Processed: 6/13/2022 2:44:24 PM PDT |                           |                     |                               |

## Auto-Scaled Chromatogram

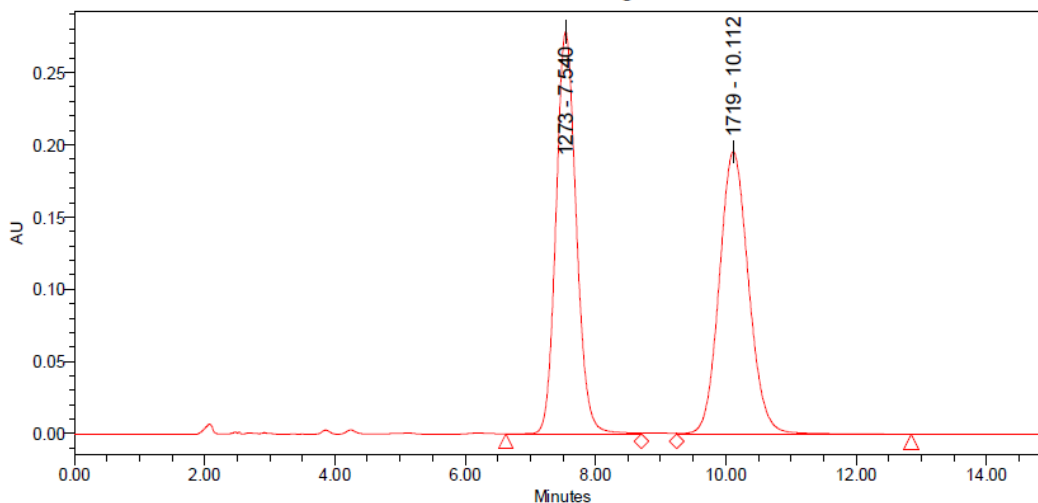

## Peak Results

|   | Name | RT     | Area    | Height | Amount | % Area |
|---|------|--------|---------|--------|--------|--------|
| 1 | 1273 | 7.540  | 6018362 | 278342 |        | 49.56  |
| 2 | 1719 | 10.112 | 6125260 | 195401 |        | 50.44  |

Processed Channel: MWD: Signal A, 265 nm/Bw:4 nm

| Peak Name | Processed Channel             | Retention Time (min) | Area    | % Area | Height |
|-----------|-------------------------------|----------------------|---------|--------|--------|
| 1 1273    | MWD: Signal A, 265 nm/Bw:4 nm | 7.540                | 6018362 | 49.56  | 278342 |
| 2 1719    | MWD: Signal A, 265 nm/Bw:4 nm | 10.112               | 6125260 | 50.44  | 195401 |

Reported by User: Michal Achmatowicz (AchmatowiczM)  
 Report Method: 1719  
 Report Method ID: 3344  
 Page: 1 of 1

Project Name: 2\_PRMT5  
 Date Printed:  
 6/13/2022  
 2:44:38 PM US/Pacific



Peak Results

|    | Name | RT     | Area  | Height | Amount | % Area |
|----|------|--------|-------|--------|--------|--------|
| 11 |      | 6.077  | 4066  | 1055   |        | 0.21   |
| 12 |      | 6.196  | 5397  | 1258   |        | 0.28   |
| 13 |      | 6.307  | 960   | 333    |        | 0.05   |
| 14 |      | 6.401  | 9193  | 2411   |        | 0.47   |
| 15 |      | 6.612  | 2908  | 853    |        | 0.15   |
| 16 |      | 6.691  | 10225 | 3470   |        | 0.53   |
| 17 |      | 6.761  | 14164 | 4265   |        | 0.73   |
| 18 |      | 6.875  | 7975  | 2423   |        | 0.41   |
| 19 |      | 7.024  | 22511 | 6904   |        | 1.16   |
| 20 |      | 7.186  | 1735  | 729    |        | 0.09   |
| 21 |      | 7.252  | 14752 | 4027   |        | 0.76   |
| 22 |      | 7.393  | 14170 | 4966   |        | 0.73   |
| 23 |      | 7.453  | 26590 | 4656   |        | 1.37   |
| 24 |      | 7.686  | 41967 | 10113  |        | 2.17   |
| 25 |      | 7.871  | 18441 | 4400   |        | 0.95   |
| 26 |      | 7.962  | 14967 | 3381   |        | 0.77   |
| 27 |      | 8.066  | 45988 | 8545   |        | 2.37   |
| 28 |      | 8.240  | 48300 | 14029  |        | 2.49   |
| 29 |      | 8.346  | 12463 | 3779   |        | 0.64   |
| 30 |      | 8.402  | 7009  | 1927   |        | 0.36   |
| 31 |      | 8.550  | 68911 | 18897  |        | 3.56   |
| 32 |      | 8.708  | 3840  | 987    |        | 0.20   |
| 33 |      | 8.811  | 6956  | 1775   |        | 0.36   |
| 34 |      | 8.909  | 13878 | 3454   |        | 0.72   |
| 35 |      | 9.011  | 13715 | 2490   |        | 0.71   |
| 36 |      | 9.201  | 2139  | 571    |        | 0.11   |
| 37 |      | 9.266  | 1342  | 508    |        | 0.07   |
| 38 |      | 9.342  | 4344  | 937    |        | 0.22   |
| 39 |      | 9.392  | 1008  | 487    |        | 0.05   |
| 40 |      | 9.428  | 2000  | 419    |        | 0.10   |
| 41 |      | 9.578  | 721   | 164    |        | 0.04   |
| 42 |      | 9.658  | 631   | 188    |        | 0.03   |
| 43 |      | 9.797  | 970   | 247    |        | 0.05   |
| 44 |      | 9.899  | 999   | 206    |        | 0.05   |
| 45 |      | 10.346 | 853   | 270    |        | 0.04   |

Processed Channel: DAD: Signal A, 265 nm/Bw:4 nm

|   | Processed Channel             | Retention Time (min) | Area | % Area | Height |
|---|-------------------------------|----------------------|------|--------|--------|
| 1 | DAD: Signal A, 265 nm/Bw:4 nm | 3.437                | 875  | 0.05   | 249    |
| 2 | DAD: Signal A, 265 nm/Bw:4 nm | 3.733                | 1734 | 0.09   | 395    |
| 3 | DAD: Signal A, 265 nm/Bw:4 nm | 4.038                | 1640 | 0.08   | 329    |

Reported by User: Michal Achmatowicz (AchmatowiczM)  
 Report Method: 1719  
 Report Method ID: 3344  
 Page: 2 of 4

Project Name: 2\_PRMT5  
 Date Printed:  
 6/13/2022  
 2:21:04 PM US/Pacific

Processed Channel: DAD: Signal A, 265 nm/Bw:4 nm

|    | Processed Channel             | Retention Time (min) | Area    | % Area | Height |
|----|-------------------------------|----------------------|---------|--------|--------|
| 4  | DAD: Signal A, 265 nm/Bw:4 nm | 4.625                | 1550    | 0.08   | 390    |
| 5  | DAD: Signal A, 265 nm/Bw:4 nm | 5.087                | 3144    | 0.16   | 533    |
| 6  | DAD: Signal A, 265 nm/Bw:4 nm | 5.212                | 2596    | 0.13   | 865    |
| 7  | DAD: Signal A, 265 nm/Bw:4 nm | 5.592                | 70336   | 3.63   | 23648  |
| 8  | DAD: Signal A, 265 nm/Bw:4 nm | 5.763                | 1104    | 0.06   | 327    |
| 9  | DAD: Signal A, 265 nm/Bw:4 nm | 5.839                | 630     | 0.03   | 252    |
| 10 | DAD: Signal A, 265 nm/Bw:4 nm | 5.926                | 1407178 | 72.65  | 460152 |
| 11 | DAD: Signal A, 265 nm/Bw:4 nm | 6.077                | 4066    | 0.21   | 1055   |
| 12 | DAD: Signal A, 265 nm/Bw:4 nm | 6.196                | 5397    | 0.28   | 1258   |
| 13 | DAD: Signal A, 265 nm/Bw:4 nm | 6.307                | 960     | 0.05   | 333    |
| 14 | DAD: Signal A, 265 nm/Bw:4 nm | 6.401                | 9193    | 0.47   | 2411   |
| 15 | DAD: Signal A, 265 nm/Bw:4 nm | 6.612                | 2908    | 0.15   | 853    |
| 16 | DAD: Signal A, 265 nm/Bw:4 nm | 6.691                | 10225   | 0.53   | 3470   |
| 17 | DAD: Signal A, 265 nm/Bw:4 nm | 6.761                | 14164   | 0.73   | 4265   |
| 18 | DAD: Signal A, 265 nm/Bw:4 nm | 6.875                | 7975    | 0.41   | 2423   |
| 19 | DAD: Signal A, 265 nm/Bw:4 nm | 7.024                | 22511   | 1.16   | 6904   |
| 20 | DAD: Signal A, 265 nm/Bw:4 nm | 7.186                | 1735    | 0.09   | 729    |
| 21 | DAD: Signal A, 265 nm/Bw:4 nm | 7.252                | 14752   | 0.76   | 4027   |
| 22 | DAD: Signal A, 265 nm/Bw:4 nm | 7.393                | 14170   | 0.73   | 4966   |
| 23 | DAD: Signal A, 265 nm/Bw:4 nm | 7.453                | 26590   | 1.37   | 4656   |
| 24 | DAD: Signal A, 265 nm/Bw:4 nm | 7.686                | 41967   | 2.17   | 10113  |
| 25 | DAD: Signal A, 265 nm/Bw:4 nm | 7.871                | 18441   | 0.95   | 4400   |
| 26 | DAD: Signal A, 265 nm/Bw:4 nm | 7.962                | 14967   | 0.77   | 3381   |
| 27 | DAD: Signal A, 265 nm/Bw:4 nm | 8.066                | 45988   | 2.37   | 8545   |
| 28 | DAD: Signal A, 265 nm/Bw:4 nm | 8.240                | 48300   | 2.49   | 14029  |
| 29 | DAD: Signal A, 265 nm/Bw:4 nm | 8.346                | 12463   | 0.64   | 3779   |
| 30 | DAD: Signal A, 265 nm/Bw:4 nm | 8.402                | 7009    | 0.36   | 1927   |
| 31 | DAD: Signal A, 265 nm/Bw:4 nm | 8.550                | 68911   | 3.56   | 18897  |
| 32 | DAD: Signal A, 265 nm/Bw:4 nm | 8.708                | 3840    | 0.20   | 987    |
| 33 | DAD: Signal A, 265 nm/Bw:4 nm | 8.811                | 6956    | 0.36   | 1775   |
| 34 | DAD: Signal A, 265 nm/Bw:4 nm | 8.909                | 13878   | 0.72   | 3454   |
| 35 | DAD: Signal A, 265 nm/Bw:4 nm | 9.011                | 13715   | 0.71   | 2490   |
| 36 | DAD: Signal A, 265 nm/Bw:4 nm | 9.201                | 2139    | 0.11   | 571    |
| 37 | DAD: Signal A, 265 nm/Bw:4 nm | 9.266                | 1342    | 0.07   | 508    |
| 38 | DAD: Signal A, 265 nm/Bw:4 nm | 9.342                | 4344    | 0.22   | 937    |
| 39 | DAD: Signal A, 265 nm/Bw:4 nm | 9.392                | 1008    | 0.05   | 487    |
| 40 | DAD: Signal A, 265 nm/Bw:4 nm | 9.428                | 2000    | 0.10   | 419    |
| 41 | DAD: Signal A, 265 nm/Bw:4 nm | 9.578                | 721     | 0.04   | 164    |
| 42 | DAD: Signal A, 265 nm/Bw:4 nm | 9.658                | 631     | 0.03   | 188    |
| 43 | DAD: Signal A, 265 nm/Bw:4 nm | 9.797                | 970     | 0.05   | 247    |

Reported by User: Michal Achmatowicz (AchmatowiczM)  
 Report Method: 1719  
 Report Method ID: 3344  
 Page: 3 of 4

Project Name: 2\_PRMT5  
 Date Printed:  
 6/13/2022  
 2:21:04 PM US/Pacific

Processed Channel: DAD: Signal A, 265 nm/Bw:4 nm

|    | Processed Channel             | Retention Time (min) | Area | % Area | Height |
|----|-------------------------------|----------------------|------|--------|--------|
| 44 | DAD: Signal A, 265 nm/Bw:4 nm | 9.899                | 999  | 0.05   | 206    |
| 45 | DAD: Signal A, 265 nm/Bw:4 nm | 10.346               | 853  | 0.04   | 270    |

# Supernatant at the end of <sup>SPACE</sup>DKR (chiral LC)

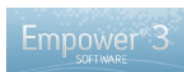

1719

## SAMPLE INFORMATION

|                                         |                          |                     |                               |
|-----------------------------------------|--------------------------|---------------------|-------------------------------|
| Sample Name:                            | NB51-40-6ML 28h, 100xdil | Acquired By:        | AchmatowiczM                  |
| Sample Type:                            | Unknown                  | Sample Set Name:    | MA_Agilent1_04292022c         |
| Vial:                                   | 1:B,7                    | Acq. Method Set:    | HPLC000305_Chiral             |
| Injection #:                            | 1                        | Processing Method:  | 1719 chiral purity v2         |
| Injection Volume:                       | 5.00 ul                  | Channel Name:       | MWD.0.0                       |
| Run Time:                               | 15.0 Minutes             | Proc. Chnl. Descr.: | MWD: Signal A, 265 nm/Bw:4 nm |
| Date Acquired: 4/29/2022 2:33:32 PMPDT  |                          |                     |                               |
| Date Processed: 6/13/2022 2:42:59 PMPDT |                          |                     |                               |

## Auto-Scaled Chromatogram

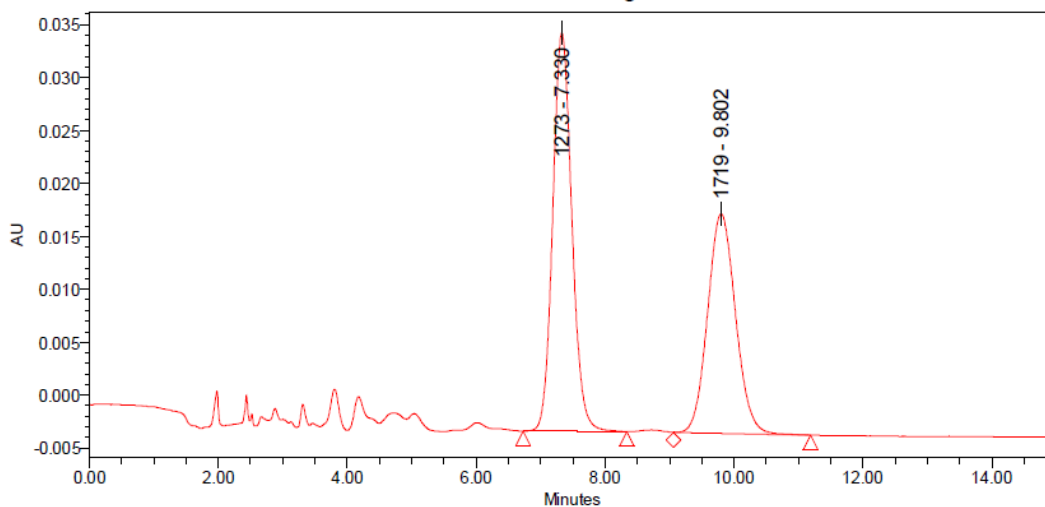

## Peak Results

|   | Name | RT    | Area   | Height | Amount | % Area |
|---|------|-------|--------|--------|--------|--------|
| 1 | 1273 | 7.330 | 774227 | 37645  |        | 55.30  |
| 2 | 1719 | 9.802 | 625918 | 20752  |        | 44.70  |

Processed Channel: MWD: Signal A, 265 nm/Bw:4 nm

| Peak Name | Processed Channel             | Retention Time (min) | Area   | % Area | Height |
|-----------|-------------------------------|----------------------|--------|--------|--------|
| 1 1273    | MWD: Signal A, 265 nm/Bw:4 nm | 7.330                | 774227 | 55.30  | 37645  |
| 2 1719    | MWD: Signal A, 265 nm/Bw:4 nm | 9.802                | 625918 | 44.70  | 20752  |

# Technical-grade MRTX1719 (achiral LC)

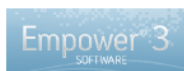

1719

## SAMPLE INFORMATION

|                   |                              |                     |                               |
|-------------------|------------------------------|---------------------|-------------------------------|
| Sample Name:      | NB51-40-11 solid,0.618uncorr | Acquired By:        | AchmatowiczM                  |
| Sample Type:      | Unknown                      | Sample Set Name:    | MA_Agilent5_05032022a         |
| Vial:             | 1:E,6                        | Acq. Method Set:    | MRTX1719_AgilentLC5_14min     |
| Injection #:      | 1                            | Processing Method:  | 1719_14min                    |
| Injection Volume: | 5.00 ul                      | Channel Name:       | DAD:0.0                       |
| Run Time:         | 14.0 Minutes                 | Proc. Chnl. Descr.: | DAD: Signal A, 265 nm/Bw:4 nm |
| Date Acquired:    | 5/3/2022 7:17:16 PM PDT      |                     |                               |
| Date Processed:   | 6/13/2022 2:15:19 PM PDT     |                     |                               |

## Auto-Scaled Chromatogram

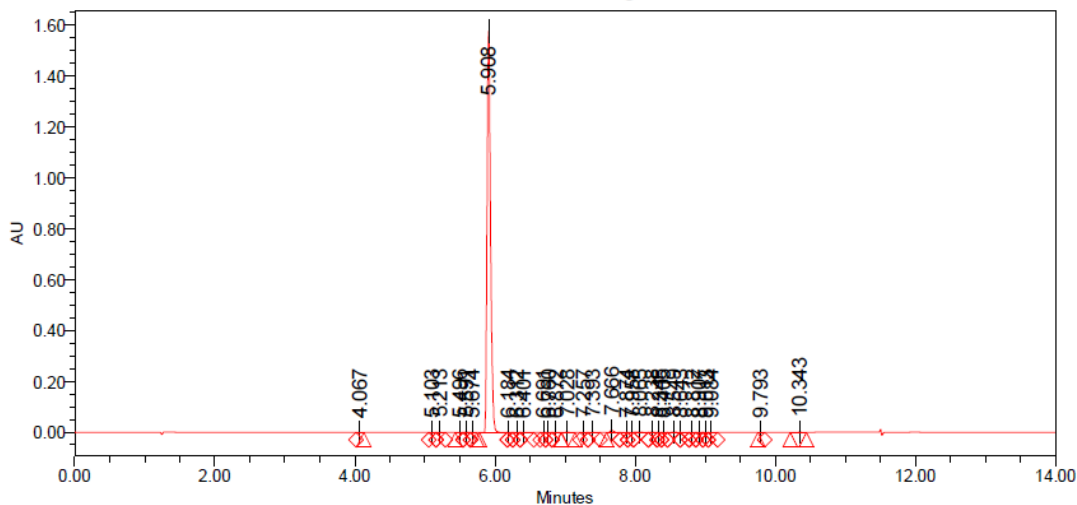

## Peak Results

| Name | RT    | Area    | Height  | Amount | % Area |
|------|-------|---------|---------|--------|--------|
| 1    | 4.067 | 996     | 371     |        | 0.02   |
| 2    | 5.103 | 2455    | 823     |        | 0.04   |
| 3    | 5.213 | 4107    | 1413    |        | 0.07   |
| 4    | 5.496 | 2193    | 679     |        | 0.04   |
| 5    | 5.591 | 7552    | 2598    |        | 0.13   |
| 6    | 5.674 | 929     | 341     |        | 0.02   |
| 7    | 5.908 | 5489456 | 1578857 |        | 98.01  |
| 8    | 6.184 | 1114    | 342     |        | 0.02   |
| 9    | 6.312 | 1906    | 568     |        | 0.03   |
| 10   | 6.401 | 3499    | 798     |        | 0.06   |

Reported by User: Michal Achmatowicz (AchmatowiczM)  
 Report Method: 1719  
 Report Method ID: 3344  
 Page: 1 of 3

Project Name: 2\_PRMT5  
 Date Printed:  
 6/13/2022  
 2:16:08 PM US/Pacific

Peak Results

|    | Name | RT     | Area  | Height | Amount | % Area |
|----|------|--------|-------|--------|--------|--------|
| 11 |      | 6.691  | 1330  | 465    |        | 0.02   |
| 12 |      | 6.760  | 1950  | 623    |        | 0.03   |
| 13 |      | 6.872  | 1050  | 283    |        | 0.02   |
| 14 |      | 7.028  | 7279  | 2365   |        | 0.13   |
| 15 |      | 7.257  | 1973  | 514    |        | 0.04   |
| 16 |      | 7.393  | 6026  | 1227   |        | 0.11   |
| 17 |      | 7.666  | 25141 | 7541   |        | 0.45   |
| 18 |      | 7.874  | 1929  | 597    |        | 0.03   |
| 19 |      | 7.958  | 4135  | 1005   |        | 0.07   |
| 20 |      | 8.065  | 13026 | 1836   |        | 0.23   |
| 21 |      | 8.238  | 5934  | 1674   |        | 0.11   |
| 22 |      | 8.345  | 1410  | 459    |        | 0.03   |
| 23 |      | 8.405  | 1178  | 325    |        | 0.02   |
| 24 |      | 8.549  | 8271  | 2119   |        | 0.15   |
| 25 |      | 8.643  | 870   | 235    |        | 0.02   |
| 26 |      | 8.812  | 695   | 218    |        | 0.01   |
| 27 |      | 8.907  | 857   | 277    |        | 0.02   |
| 28 |      | 9.013  | 763   | 259    |        | 0.01   |
| 29 |      | 9.084  | 1546  | 398    |        | 0.03   |
| 30 |      | 9.793  | 576   | 209    |        | 0.01   |
| 31 |      | 10.343 | 871   | 244    |        | 0.02   |

Processed Channel: DAD: Signal A, 265 nm/Bw:4 nm

|    | Processed Channel             | Retention Time (min) | Area    | % Area | Height  |
|----|-------------------------------|----------------------|---------|--------|---------|
| 1  | DAD: Signal A, 265 nm/Bw:4 nm | 4.067                | 996     | 0.02   | 371     |
| 2  | DAD: Signal A, 265 nm/Bw:4 nm | 5.103                | 2455    | 0.04   | 823     |
| 3  | DAD: Signal A, 265 nm/Bw:4 nm | 5.213                | 4107    | 0.07   | 1413    |
| 4  | DAD: Signal A, 265 nm/Bw:4 nm | 5.496                | 2193    | 0.04   | 679     |
| 5  | DAD: Signal A, 265 nm/Bw:4 nm | 5.591                | 7552    | 0.13   | 2598    |
| 6  | DAD: Signal A, 265 nm/Bw:4 nm | 5.674                | 929     | 0.02   | 341     |
| 7  | DAD: Signal A, 265 nm/Bw:4 nm | 5.908                | 5489456 | 98.01  | 1578857 |
| 8  | DAD: Signal A, 265 nm/Bw:4 nm | 6.184                | 1114    | 0.02   | 342     |
| 9  | DAD: Signal A, 265 nm/Bw:4 nm | 6.312                | 1906    | 0.03   | 568     |
| 10 | DAD: Signal A, 265 nm/Bw:4 nm | 6.401                | 3499    | 0.06   | 798     |
| 11 | DAD: Signal A, 265 nm/Bw:4 nm | 6.691                | 1330    | 0.02   | 465     |
| 12 | DAD: Signal A, 265 nm/Bw:4 nm | 6.760                | 1950    | 0.03   | 623     |
| 13 | DAD: Signal A, 265 nm/Bw:4 nm | 6.872                | 1050    | 0.02   | 283     |
| 14 | DAD: Signal A, 265 nm/Bw:4 nm | 7.028                | 7279    | 0.13   | 2365    |
| 15 | DAD: Signal A, 265 nm/Bw:4 nm | 7.257                | 1973    | 0.04   | 514     |
| 16 | DAD: Signal A, 265 nm/Bw:4 nm | 7.393                | 6026    | 0.11   | 1227    |
| 17 | DAD: Signal A, 265 nm/Bw:4 nm | 7.666                | 25141   | 0.45   | 7541    |

Reported by User: Michal Achmatowicz (AchmatowiczM)  
 Report Method: 1719  
 Report Method ID: 3344  
 Page: 2 of 3

Project Name: 2\_PRMT5  
 Date Printed:  
 6/13/2022  
 2:16:08 PM US/Pacific

Processed Channel: DAD: Signal A, 265 nm/Bw:4 nm

|    | Processed Channel             | Retention Time (min) | Area  | % Area | Height |
|----|-------------------------------|----------------------|-------|--------|--------|
| 18 | DAD: Signal A, 265 nm/Bw:4 nm | 7.874                | 1929  | 0.03   | 597    |
| 19 | DAD: Signal A, 265 nm/Bw:4 nm | 7.958                | 4135  | 0.07   | 1005   |
| 20 | DAD: Signal A, 265 nm/Bw:4 nm | 8.065                | 13026 | 0.23   | 1836   |
| 21 | DAD: Signal A, 265 nm/Bw:4 nm | 8.238                | 5934  | 0.11   | 1674   |
| 22 | DAD: Signal A, 265 nm/Bw:4 nm | 8.345                | 1410  | 0.03   | 459    |
| 23 | DAD: Signal A, 265 nm/Bw:4 nm | 8.405                | 1178  | 0.02   | 325    |
| 24 | DAD: Signal A, 265 nm/Bw:4 nm | 8.549                | 8271  | 0.15   | 2119   |
| 25 | DAD: Signal A, 265 nm/Bw:4 nm | 8.643                | 870   | 0.02   | 235    |
| 26 | DAD: Signal A, 265 nm/Bw:4 nm | 8.812                | 695   | 0.01   | 218    |
| 27 | DAD: Signal A, 265 nm/Bw:4 nm | 8.907                | 857   | 0.02   | 277    |
| 28 | DAD: Signal A, 265 nm/Bw:4 nm | 9.013                | 763   | 0.01   | 259    |
| 29 | DAD: Signal A, 265 nm/Bw:4 nm | 9.084                | 1546  | 0.03   | 398    |
| 30 | DAD: Signal A, 265 nm/Bw:4 nm | 9.793                | 576   | 0.01   | 209    |
| 31 | DAD: Signal A, 265 nm/Bw:4 nm | 10.343               | 871   | 0.02   | 244    |

# Technical-grade MRTX1719 (chiral LC)

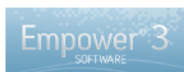

1719

## SAMPLE INFORMATION

|                                          |                                |                     |                               |
|------------------------------------------|--------------------------------|---------------------|-------------------------------|
| Sample Name:                             | NB51-40-11 solid, 0.618 uncorr | Acquired By:        | AchmatowiczM                  |
| Sample Type:                             | Unknown                        | Sample Set Name:    | MA_Agilent1_05022022b         |
| Vial:                                    | 1:D,1                          | Acq. Method Set:    | HPLC000305_Chiral             |
| Injection #:                             | 1                              | Processing Method:  | 1719 chiral purity v2         |
| Injection Volume:                        | 5.00 ul                        | Channel Name:       | MWD.0.0                       |
| Run Time:                                | 15.0 Minutes                   | Proc. Chnl. Descr.: | MWD: Signal A, 265 nm/Bw:4 nm |
| Date Acquired: 5/2/2022 1:00:49 PM PDT   |                                |                     |                               |
| Date Processed: 6/13/2022 2:40:57 PM PDT |                                |                     |                               |

## Auto-Scaled Chromatogram

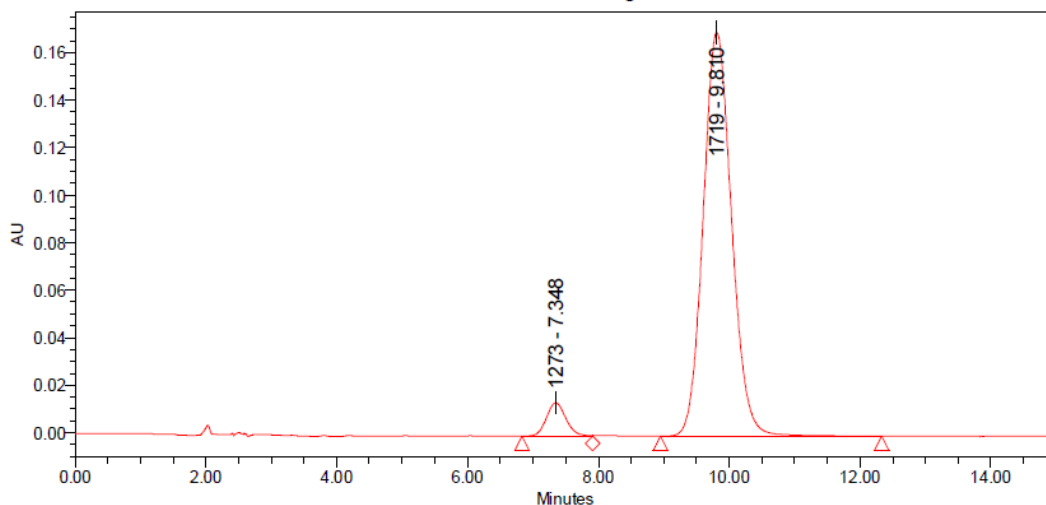

## Peak Results

|   | Name | RT    | Area    | Height | Amount | % Area |
|---|------|-------|---------|--------|--------|--------|
| 1 | 1273 | 7.348 | 289067  | 13980  |        | 5.35   |
| 2 | 1719 | 9.810 | 5115239 | 169823 |        | 94.65  |

Processed Channel: MWD: Signal A, 265 nm/Bw:4 nm

| Peak Name | Processed Channel             | Retention Time (min) | Area    | % Area | Height |
|-----------|-------------------------------|----------------------|---------|--------|--------|
| 1 1273    | MWD: Signal A, 265 nm/Bw:4 nm | 7.348                | 289067  | 5.35   | 13980  |
| 2 1719    | MWD: Signal A, 265 nm/Bw:4 nm | 9.810                | 5115239 | 94.65  | 169823 |

Reported by User: Michal Achmatowicz (AchmatowiczM)  
 Report Method: 1719  
 Report Method ID: 3344  
 Page: 1 of 1

Project Name: 2\_PRMT5  
 Date Printed:  
 6/13/2022  
 2:41:11 PM US/Pacific

# Upgraded MRTX1719 (achiral LC)

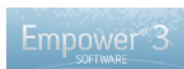

1719

## SAMPLE INFORMATION

|                                          |                             |                     |                               |
|------------------------------------------|-----------------------------|---------------------|-------------------------------|
| Sample Name:                             | NB51-40-210S solid,20-40Cx4 | Acquired By:        | AchmatowiczM                  |
| Sample Type:                             | Unknown                     | Sample Set Name:    | MA_Agilent5_05182022a         |
| Vial:                                    | 1:B,3                       | Acq. Method Set:    | AgilentLC5_MRTX1719_Purity    |
| Injection #:                             | 1                           | Processing Method:  | 1719_14min                    |
| Injection Volume:                        | 5.00 ul                     | Channel Name:       | DAD:0.0                       |
| Run Time:                                | 21.0 Minutes                | Proc. Chnl. Descr.: | DAD: Signal A, 265 nm/Bw:4 nm |
| Date Acquired: 5/18/2022 12:50:46 PM PDT |                             |                     |                               |
| Date Processed: 6/13/2022 2:27:05 PM PDT |                             |                     |                               |

## Auto-Scaled Chromatogram

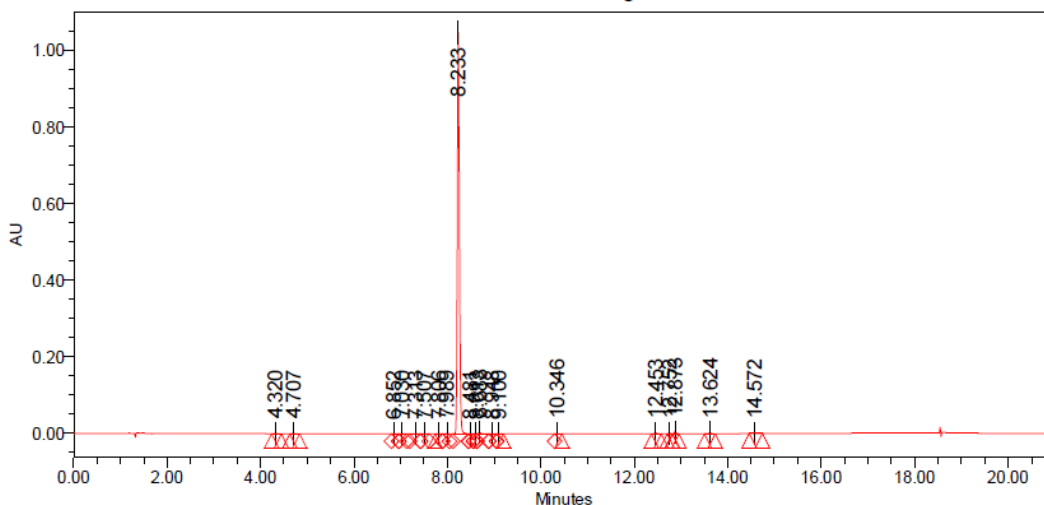

## Peak Results

|    | Name | RT    | Area    | Height  | Amount | % Area |
|----|------|-------|---------|---------|--------|--------|
| 1  |      | 4.320 | 1077    | 251     |        | 0.03   |
| 2  |      | 4.707 | 1758    | 410     |        | 0.05   |
| 3  |      | 6.852 | 1304    | 386     |        | 0.04   |
| 4  |      | 7.030 | 2226    | 681     |        | 0.07   |
| 5  |      | 7.313 | 1236    | 256     |        | 0.04   |
| 6  |      | 7.507 | 1277    | 307     |        | 0.04   |
| 7  |      | 7.806 | 856     | 238     |        | 0.03   |
| 8  |      | 7.989 | 1928    | 513     |        | 0.06   |
| 9  |      | 8.233 | 3231703 | 1046318 |        | 98.00  |
| 10 |      | 8.481 | 2030    | 478     |        | 0.06   |

Reported by User: Michal Achmatowicz (AchmatowiczM)  
 Report Method: 1719  
 Report Method ID: 3344  
 Page: 1 of 2

Project Name: 2\_PRMT5  
 Date Printed:  
 6/13/2022  
 2:29:17 PM US/Pacific

Peak Results

|    | Name | RT     | Area  | Height | Amount | % Area |
|----|------|--------|-------|--------|--------|--------|
| 11 |      | 8.613  | 1367  | 428    |        | 0.04   |
| 12 |      | 8.688  | 10844 | 2661   |        | 0.33   |
| 13 |      | 8.948  | 1296  | 280    |        | 0.04   |
| 14 |      | 9.100  | 773   | 179    |        | 0.02   |
| 15 |      | 10.346 | 2426  | 753    |        | 0.07   |
| 16 |      | 12.453 | 6742  | 2284   |        | 0.20   |
| 17 |      | 12.752 | 4638  | 1760   |        | 0.14   |
| 18 |      | 12.873 | 12624 | 4178   |        | 0.38   |
| 19 |      | 13.624 | 8347  | 2741   |        | 0.25   |
| 20 |      | 14.572 | 3349  | 893    |        | 0.10   |

Processed Channel: DAD: Signal A, 265 nm/Bw:4 nm

|    | Processed Channel             | Retention Time (min) | Area    | % Area | Height  |
|----|-------------------------------|----------------------|---------|--------|---------|
| 1  | DAD: Signal A, 265 nm/Bw:4 nm | 4.320                | 1077    | 0.03   | 251     |
| 2  | DAD: Signal A, 265 nm/Bw:4 nm | 4.707                | 1758    | 0.05   | 410     |
| 3  | DAD: Signal A, 265 nm/Bw:4 nm | 6.852                | 1304    | 0.04   | 386     |
| 4  | DAD: Signal A, 265 nm/Bw:4 nm | 7.030                | 2226    | 0.07   | 681     |
| 5  | DAD: Signal A, 265 nm/Bw:4 nm | 7.313                | 1236    | 0.04   | 256     |
| 6  | DAD: Signal A, 265 nm/Bw:4 nm | 7.507                | 1277    | 0.04   | 307     |
| 7  | DAD: Signal A, 265 nm/Bw:4 nm | 7.806                | 856     | 0.03   | 238     |
| 8  | DAD: Signal A, 265 nm/Bw:4 nm | 7.989                | 1928    | 0.06   | 513     |
| 9  | DAD: Signal A, 265 nm/Bw:4 nm | 8.233                | 3231703 | 98.00  | 1046318 |
| 10 | DAD: Signal A, 265 nm/Bw:4 nm | 8.481                | 2030    | 0.06   | 478     |
| 11 | DAD: Signal A, 265 nm/Bw:4 nm | 8.613                | 1367    | 0.04   | 428     |
| 12 | DAD: Signal A, 265 nm/Bw:4 nm | 8.688                | 10844   | 0.33   | 2661    |
| 13 | DAD: Signal A, 265 nm/Bw:4 nm | 8.948                | 1296    | 0.04   | 280     |
| 14 | DAD: Signal A, 265 nm/Bw:4 nm | 9.100                | 773     | 0.02   | 179     |
| 15 | DAD: Signal A, 265 nm/Bw:4 nm | 10.346               | 2426    | 0.07   | 753     |
| 16 | DAD: Signal A, 265 nm/Bw:4 nm | 12.453               | 6742    | 0.20   | 2284    |
| 17 | DAD: Signal A, 265 nm/Bw:4 nm | 12.752               | 4638    | 0.14   | 1760    |
| 18 | DAD: Signal A, 265 nm/Bw:4 nm | 12.873               | 12624   | 0.38   | 4178    |
| 19 | DAD: Signal A, 265 nm/Bw:4 nm | 13.624               | 8347    | 0.25   | 2741    |
| 20 | DAD: Signal A, 265 nm/Bw:4 nm | 14.572               | 3349    | 0.10   | 893     |

# Upgraded MRTX1719 (chiral LC)

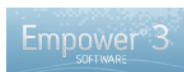

1719

## SAMPLE INFORMATION

|                                         |                               |                     |                               |
|-----------------------------------------|-------------------------------|---------------------|-------------------------------|
| Sample Name:                            | NB51-40-220 0.626mg/mL uncorr | Acquired By:        | AchmatowiczM                  |
| Sample Type:                            | Unknown                       | Sample Set Name:    | MA_Agilent1_05242022a         |
| Vial:                                   | 1:A,3                         | Acq. Method Set:    | HPLC000305_Chiral             |
| Injection #:                            | 1                             | Processing Method:  | 1719 chiral purity            |
| Injection Volume:                       | 5.00 ul                       | Channel Name:       | MWD.0.0                       |
| Run Time:                               | 15.0 Minutes                  | Proc. Chnl. Descr.: | MWD: Signal A, 265 nm/Bw:4 nm |
| Date Acquired: 5/24/2022 10:29:00 AMPDT |                               |                     |                               |
| Date Processed: 6/13/2022 2:25:32 PMPDT |                               |                     |                               |

## Auto-Scaled Chromatogram

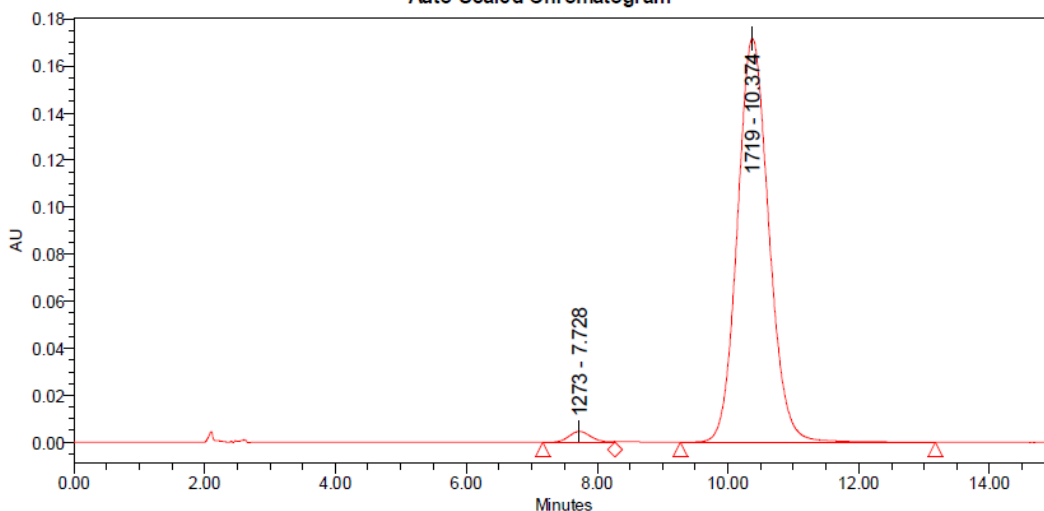

## Peak Results

|   | Name | RT     | Area    | Height | Amount | % Area |
|---|------|--------|---------|--------|--------|--------|
| 1 | 1273 | 7.728  | 107806  | 4611   |        | 1.85   |
| 2 | 1719 | 10.374 | 5722739 | 171762 |        | 98.15  |

Processed Channel: MWD: Signal A, 265 nm/Bw:4 nm

| Peak Name | Processed Channel             | Retention Time (min) | Area    | % Area | Height |
|-----------|-------------------------------|----------------------|---------|--------|--------|
| 1 1273    | MWD: Signal A, 265 nm/Bw:4 nm | 7.728                | 107806  | 1.85   | 4611   |
| 2 1719    | MWD: Signal A, 265 nm/Bw:4 nm | 10.374               | 5722739 | 98.15  | 171762 |

Reported by User: Michal Achmatowicz (AchmatowiczM)  
 Report Method: 1719  
 Report Method ID: 3344  
 Page: 1 of 1

Project Name: 2\_PRMT5  
 Date Printed:  
 6/13/2022  
 2:25:45 PM US/Pacific
